# Supplementary material for: Hexane Insoluble Fraction from Purple Rice Extract Retards Carcinogenesis and Castration-Resistant Cancer Growth of Prostate through Suppression of Androgen Receptor Mediated Cell Proliferation and Metabolism
Source: MDPI journal article supplement (doi:10.3390/nu12020558), 2020-02-20
Supplement: s1 [file s1]

# Figure S1

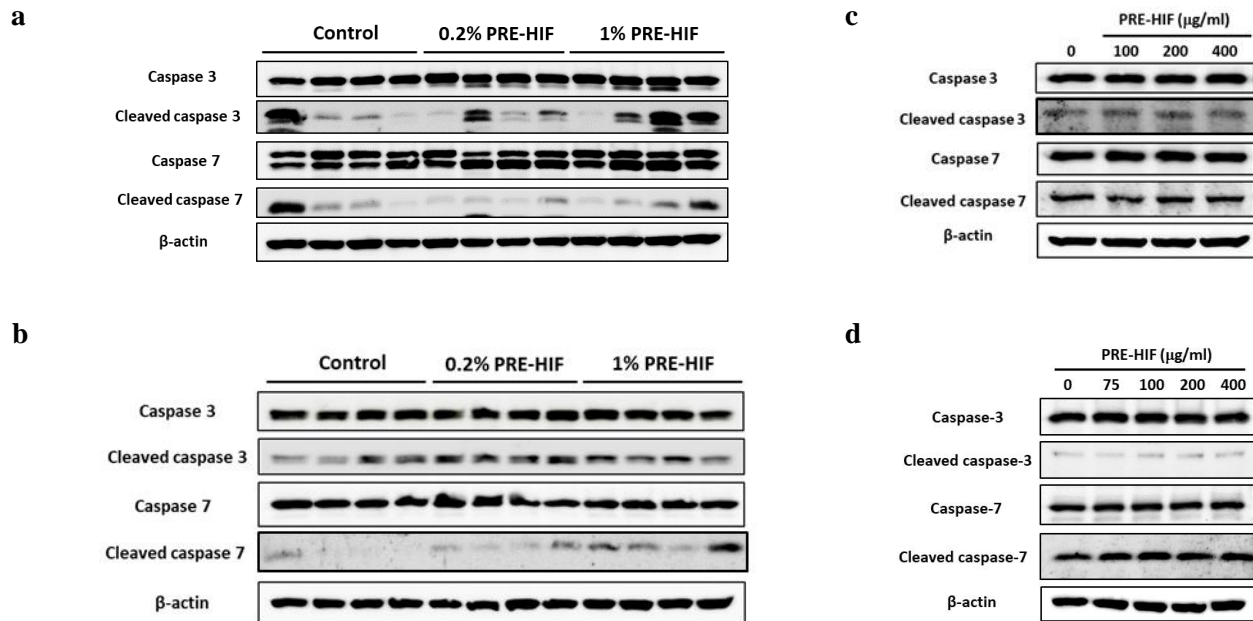

**Figure S1** Effects of PRE-HIF on caspase and cleaved caspase expression. Immunoblots of protein lysates from **a)** the lateral prostate samples from TRAP rats, **b)** tumor samples from the PCa1 xenograft model, **c)** PRE-HIF treated LNCaP or **d)** PCa1 cells (72h) were probed with antibodies against proteins related to apoptosis.

**Figure S2**

**a**

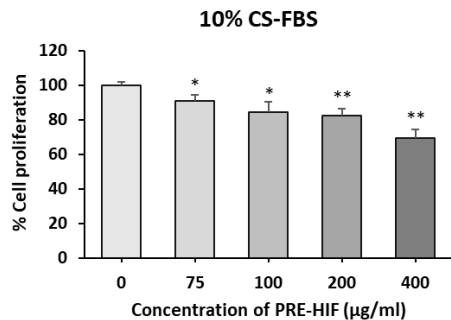

**b**

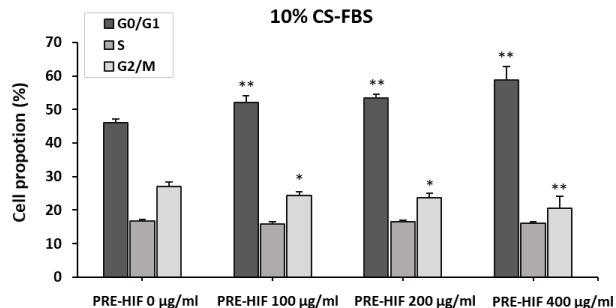

**Figure S2** Effects of HIF on rat CRPC cell line PCa1 in completely hormone depleted condition (10% CS-FBS supplemented DMEM). **a)** Cell proliferation of PCa1 cells after incubation with PRE-HIF for 72 hours. **b)** Effects on the cell cycle of PRE-HIF treated PCa1 cells (72h). \* $p < 0.05$ ; \*\* $p < 0.01$  compared to control. CS-FBS; Charcoal Stripped Fetal Bovine Serum.
